# Supplementary material for: MCMC implementation of the optimal Bayesian classifier for non-Gaussian models: model-based RNA-Seq classification
Source: PubMed Central journal article supplement (PMC4265360; doi:10.1186/s12859-014-0401-3), 2014-12-10
Supplement: 12859_2014_401_MOESM1_ESM.pdf [file 12859_2014_401_MOESM1_ESM.pdf]

# Additional File 1 - A Bayesian Multivariate Poisson Model for RNA-Seq Classification

December 3, 2014

---

**Additional File 1: Algorithm 1** Calibrate Priors - This is the procedure to use discarded features to create calibrated prior distributions for use in a classification problem.

---

```

1:  $\mu$ -list  $\leftarrow \square$ 
2:  $\Sigma_{i,i}$ -list  $\leftarrow \square$ 
3:  $\Sigma_{i,j}$ -list  $\leftarrow \square$ 
4: for  $i = 1 : s$  do ▷  $s$  pairs sampled
5:   Randomly select a pair of features  $f_1, f_2$ 
6:    $dsub \leftarrow$  data for this pair
7:   Initialize uniform priors
8:   MCMCSamples  $\leftarrow N$  MCMC Samples using  $dsub$ 
9:    $E[\mu_1], E[\mu_2] \leftarrow$  Sample  $\mu$  means from MCMCSamples
10:  Append  $E[\mu_1], E[\mu_2]$  to  $\mu$ -list
11:  Append  $E[\Sigma_{1,1}], E[\Sigma_{2,2}]$  to  $\Sigma_{i,i}$ -list
12:  Append  $E[\Sigma_{0,1}]$  to  $\Sigma_{i,j}$ -list
13: sigdiagmean  $\leftarrow$  mean( $\Sigma_{i,i}$ -list)
14: sigoffmean  $\leftarrow$  mean( $\Sigma_{i,j}$ -list)
15: sigdiagvar  $\leftarrow \frac{1}{s-1} \sum_{i=1}^s (\text{sigdiagmean} - \Sigma_{i,i}\text{-list}[i])^2$ 
16:  $\hat{m} \leftarrow$  mean( $\mu$ -list)
17:  $\hat{v} \leftarrow$  var( $\mu$ -list)
18:  $\hat{\sigma}^2 \leftarrow 2 \times \text{sigdiagmean} \times (\frac{\text{sigdiagmean}^2}{\text{sigdiagvar}} + 1)$ 
19:  $\hat{\rho} \leftarrow \frac{\text{sigoffmean}}{\text{sigdiagmean}}$ 
20:  $\hat{\kappa} \leftarrow \frac{2 \times \text{sigdiagmean}^2}{\text{sigdiagvar}} + D + 3$ 

```

---

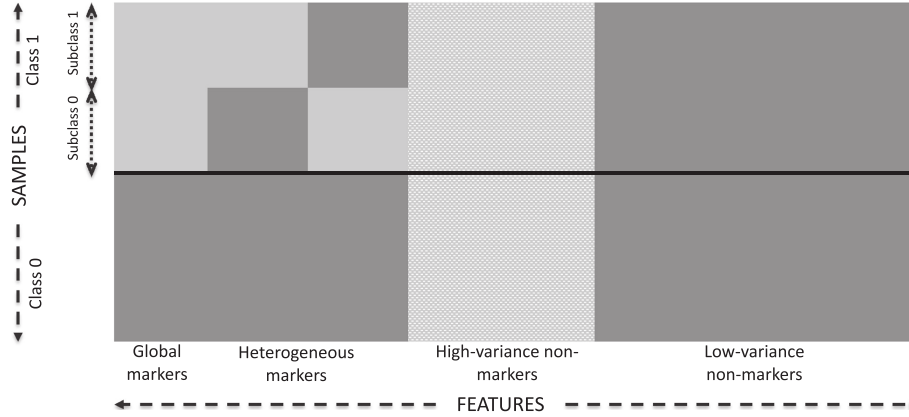

Additional file 1: Figure 1: The multivariate normal distribution used to generate samples for the IC synthetic data case. The block structure indicates the several different types of features that are generated. Used with permission from Ghaffari *et al.*, 2013.

---

**Additional File 1: Algorithm 2** Generate IC Synthetic Data - To examine the effects of independent covariance matrices, we used the following IC method to first draw random covariance matrices for each class, and then to sample data.

**Require:**  $N, d_{low}, d_{high}$  ▷  $N$ : Number of samples desired

- 1:  $D \leftarrow 20$
  - 2:  $\kappa \leftarrow D + 2$
  - 3: **for** each class **do**
  - 4:      $\mu \leftarrow \text{Normal}(0, 0.2) \times \text{ones}(D)$
  - 5:      $\sigma \leftarrow \text{Normal}(0, 0.2)$
  - 6:      $\Sigma \leftarrow \text{Inverse-Wishart}(I_D(\kappa - D - 1) * \sigma, D + 2)$
  - 7:     **if** Low correlation features **then**
  - 8:         off-diagonal( $\Sigma$ )  $\leftarrow 0$
  - 9:     data  $\leftarrow$  empty  $N \times D$  matrix
  - 10:     lams  $\leftarrow$  Draw  $N$  vectors from  $\text{Normal}(\mu, \Sigma)$
  - 11:     **for**  $i = 1 : N$  **do**
  - 12:         **for**  $j = 1 : D$  **do**
  - 13:             data[ $i, j$ ]  $\leftarrow$  Poisson-draw( $\text{Uniform}(d_{low}, d_{high}) \times \exp(\text{lams}[i, j])$ )
-

---

**Additional File 1: Algorithm 3** Synthetic Validation Procedure - The steps used to generate the sets of points for each  $N_{trn}$  (the number of training samples in each class along the x-axis in the paper's Figure 3).

---

- 1: **for**  $i = 1 : N$  **do**  $\triangleright N$ : Number of averages desired
  - 2:      $\mu_0 \leftarrow \text{Normal-draw}(0.0, 0.2)$
  - 3:      $\mu_1 \leftarrow \text{Normal-draw}(0.0, 0.2)$
  - 4:      $\sigma_0 \leftarrow \text{InverseGamma-draw}(3.0, 1.0)$
  - 5:      $\sigma_1 \leftarrow \text{InverseGamma-draw}(3.0, 1.0)$
  - 6:     train-data-0  $\leftarrow \text{genData}(\mu_0, \sigma_1, N_{trn}, \rho)$
  - 7:     train-data-1  $\leftarrow \text{genData}(\mu_1, \sigma_1, N_{trn}, \rho)$
  - 8:     test-data-0  $\leftarrow \text{genData}(\mu_0, \sigma_1, N_{test}, \rho)$
  - 9:     test-data-1  $\leftarrow \text{genData}(\mu_0, \sigma_1, N_{test}, \rho)$
  - 10:    used-features  $\leftarrow$  Randomly select 4 features
  - Using Training data:
  - 11:     hyperparameters  $\leftarrow$  MCMC using Algorithm 1 and used-features<sup>c</sup>
  - 12:     Train (Run) Calibrated MCMC with hyperparameters
  - 13:     Train (Run) MCMC with weakly informative priors
  - 14:     Train SVM
  - 15:     Train LDA
  - 16:     Train 3NN
  - 17:     Train Normal OBC
  - Using testing data:
  - 18:     Evaluate Calibrated MCMC
  - 19:     Evaluate MCMC with weakly informative priors
  - 20:     Evaluate SVM
  - 21:     Evaluate LDA
  - 22:     Evaluate 3NN
  - 23:     Evaluate Normal OBC
-

---

**Additional File 1: Algorithm 4** Real Data Validation Procedure - The procedure used to generate each set of points along the x-axis of Figure 4 in the paper given a desired number of training samples  $N_{trntotal}$  over  $N$  averages with an *a priori* known value of  $c$ .

---

1: **for**  $i = 1 : N$  **do**  $\triangleright N$ : Number of averages desired  
2:   train-data<sub>0</sub>  $\leftarrow$  draw  $\text{round}(c * N_{trntotal})$  samples from data<sub>0</sub>  
3:   train-data<sub>1</sub>  $\leftarrow$  draw  $\text{round}((1 - c) * N_{trntotal})$  samples from data<sub>1</sub>  
4:   test-data<sub>0</sub>  $\leftarrow$  data<sub>0</sub> - train-data<sub>0</sub>  
5:   test-data<sub>1</sub>  $\leftarrow$  data<sub>1</sub> - train-data<sub>1</sub>  
6:   used-features  $\leftarrow$  Randomly select 4 features  
   Using Training data:  
7:   hyperparameters  $\leftarrow$  Algorithm 1 MCMC using used-features<sup>c</sup>  
8:   Train (Run) Calibrated MCMC using hyperparameters  
9:   Train (Run) MCMC with weakly informative priors  
10:   Train SVM  
11:   Train LDA  
12:   Train 3NN  
13:   Train Normal OBC  
   Using testing data:  
14:   Evaluate Calibrated MCMC  
15:   Evaluate MCMC with weakly informative priors  
16:   Evaluate SVM  
17:   Evaluate LDA  
18:   Evaluate 3NN  
19:   Evaluate Normal OBC

---

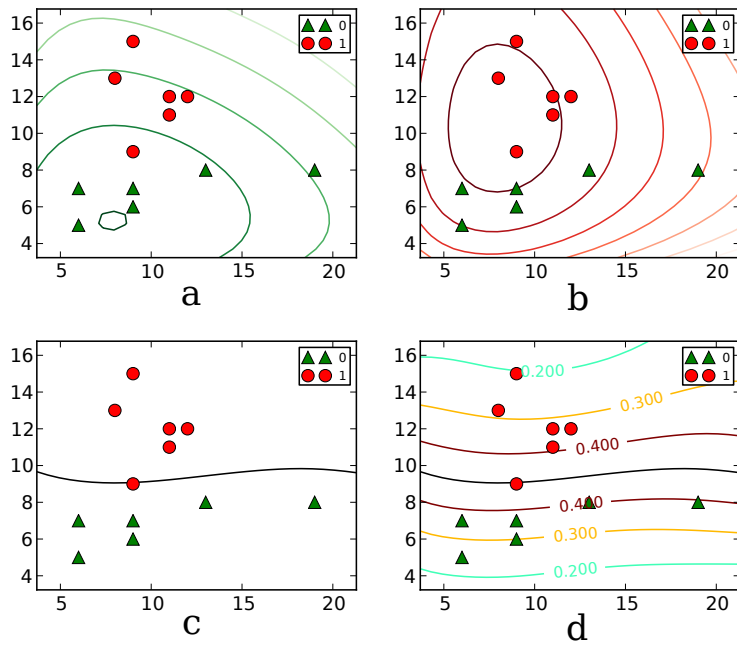

Additional file 1: Figure 2: A simple two class, two gene, synthetic example demonstrates the use of the MP OBC. Six training samples from each class (circles and triangles) are shown in all four panels and used to train the MP model. After MCMC computation, the resulting effective class conditional density contour is shown for the triangles in panel a and the circles in panel b. Panel c then shows the resulting MP OBC decision boundary resulting from these effective class conditional densities and panel d shows the contours of the optimal Bayes conditional error estimate plotted next to the classifier decision boundary.

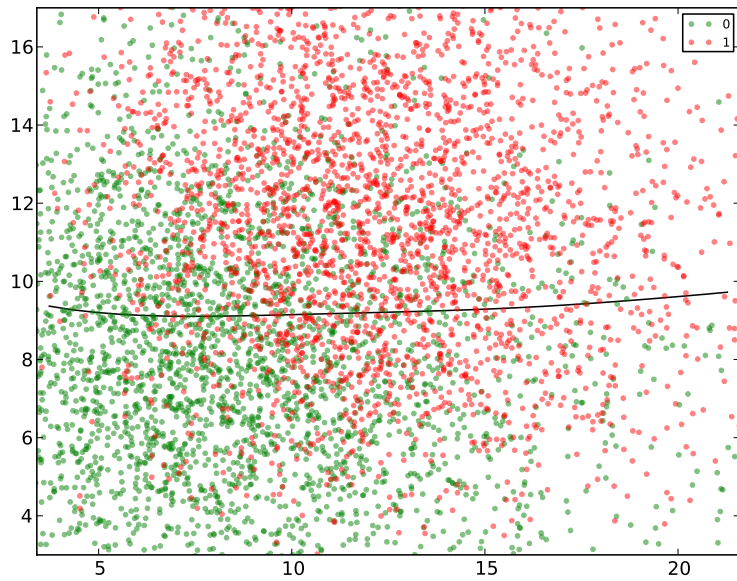

Additional file 1: Figure 3: Using the same classifier, we can now evaluate the performance of the classifier using 3000 testing samples from each class. When evaluated and averaged, this particular example results in a classification error of 0.29.

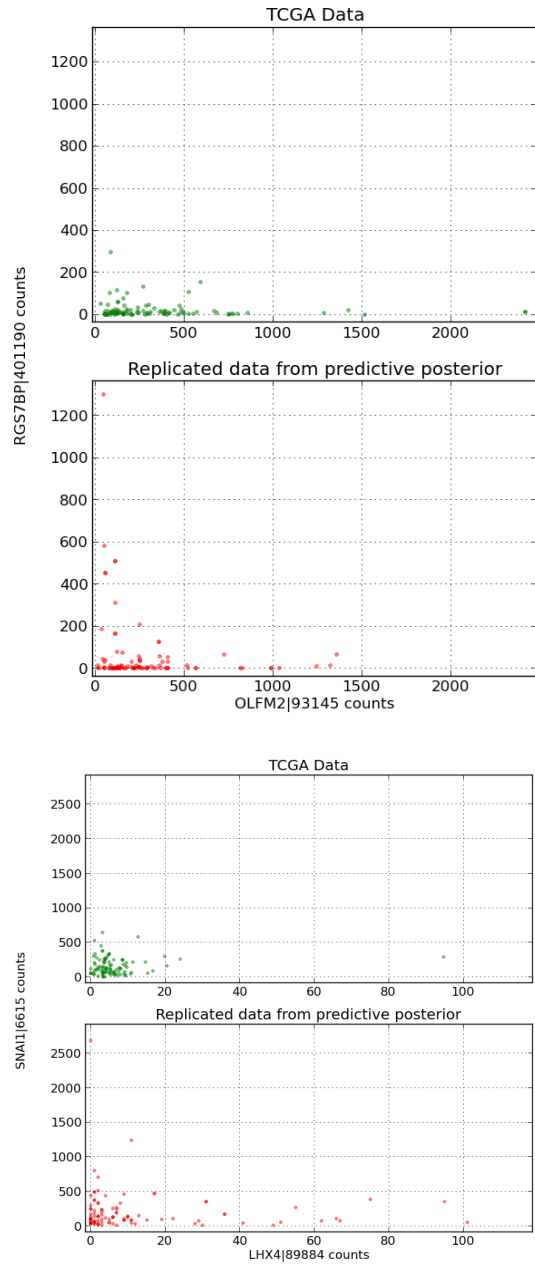

Additional file 1: Figure 4: Two examples of 100 samples from adenocarcinoma TCGA tumor samples and the posterior predictive  $x^{rep}$  simulation from the MP model.

Additional file 1: Table 1: Posterior predictive model diagnostic – 5th quantile.

| Gene ID          | Mean expression (counts) | $T(S_n)$ | 95th int. $T(x^{rep})$ | P-value |
|------------------|--------------------------|----------|------------------------|---------|
| MRGPRX1—259249   | 0.0                      | 0.00     | [0.00, 0.00]           | 0.50    |
| C17orf105—284067 | 0.0                      | 0.00     | [0.00, 0.00]           | 0.50    |
| HBBP1—3044       | 0.1                      | 0.00     | [0.00, 0.00]           | 0.50    |
| SNORA18—677805   | 0.2                      | 0.00     | [0.00, 0.00]           | 0.50    |
| SCN10A—6336      | 0.3                      | 0.00     | [0.00, 0.00]           | 0.50    |
| CDCP2—200008     | 0.7                      | 0.00     | [0.00, 0.00]           | 0.50    |
| FGF17—8822       | 3.3                      | 0.00     | [0.00, 0.00]           | 0.50    |
| NTN5—126147      | 5.7                      | 1.32     | [0.00, 0.00]           | 0.00    |
| NCRNA00185—55410 | 11.5                     | 0.00     | [0.00, 0.00]           | 0.50    |
| CCR8—1237        | 16.6                     | 1.46     | [0.00, 1.90]           | 0.06    |
| CCDC33—80125     | 23.1                     | 0.00     | [0.00, 0.00]           | 0.50    |
| PPAPDC3—84814    | 23.5                     | 6.00     | [2.95, 8.95]           | 0.32    |
| PCDHGB2—56103    | 68.1                     | 5.19     | [1.95, 10.80]          | 0.47    |
| FAM81A—145773    | 81.1                     | 13.38    | [5.00, 17.90]          | 0.23    |
| ZNF383—163087    | 81.2                     | 54.44    | [24.00, 48.45]         | 0.01    |
| ANKRD1—27063     | 87.1                     | 1.23     | [0.00, 3.95]           | 0.52    |
| UGT2B4—7363      | 93.4                     | 0.00     | [0.00, 0.00]           | 0.50    |
| IL12RB1—3594     | 98.9                     | 15.33    | [13.85, 36.40]         | 0.88    |
| ZNF628—89887     | 160.0                    | 75.54    | [41.95, 83.80]         | 0.16    |
| FBF1—85302       | 184.2                    | 52.03    | [29.60, 75.50]         | 0.41    |
| ZNF615—284370    | 209.2                    | 70.60    | [36.95, 81.40]         | 0.16    |
| RHBDD1—84236     | 299.9                    | 127.69   | [82.90, 170.90]        | 0.46    |
| NICN1—84276      | 330.1                    | 173.29   | [87.95, 187.40]        | 0.12    |
| COQ6—51004       | 369.7                    | 193.25   | [106.95, 194.20]       | 0.05    |
| CHAF1A—10036     | 387.3                    | 150.70   | [81.55, 190.65]        | 0.30    |
| DTD1—92675       | 534.5                    | 273.70   | [141.50, 282.20]       | 0.07    |
| EARS2—124454     | 663.7                    | 380.07   | [193.10, 356.85]       | 0.03    |
| KIAA1737—85457   | 668.3                    | 365.58   | [214.25, 393.95]       | 0.12    |
| LRRC8D—55144     | 690.2                    | 445.36   | [214.45, 405.95]       | 0.02    |
| SKIL—6498        | 691.0                    | 336.66   | [199.70, 368.85]       | 0.15    |
| WDR36—134430     | 761.6                    | 531.67   | [258.20, 479.55]       | 0.02    |
| ZNF259—8882      | 831.0                    | 455.39   | [221.15, 425.20]       | 0.03    |
| CHSY1—22856      | 1029.7                   | 474.64   | [269.05, 548.10]       | 0.15    |
| DHX8—1659        | 1192.9                   | 695.25   | [354.10, 728.70]       | 0.08    |
| AGTRAP—57085     | 1254.0                   | 539.55   | [283.75, 622.85]       | 0.20    |
| VPS26B—112936    | 1337.3                   | 643.79   | [350.35, 716.25]       | 0.17    |
| MCM4—4173        | 1543.3                   | 343.29   | [202.80, 528.50]       | 0.51    |
| SLC2A3—6515      | 1559.7                   | 338.07   | [178.00, 474.20]       | 0.38    |
| VPS39—23339      | 1594.0                   | 908.35   | [460.90, 964.45]       | 0.07    |
| FOXA1—3169       | 1800.3                   | 396.41   | [217.10, 584.20]       | 0.40    |



Additional file 1: Table 2: Posterior predictive model diagnostic – Median.

| Gene ID          | Mean expression (counts) | $T(S_n)$ | 95th int. $T(x^{rep})$ | P-value |
|------------------|--------------------------|----------|------------------------|---------|
| MRGPRX1—259249   | 0.0                      | 0.00     | [0.00, 0.00]           | 0.50    |
| C17orf105—284067 | 0.0                      | 0.00     | [0.00, 0.00]           | 0.50    |
| HBBP1—3044       | 0.1                      | 0.00     | [0.00, 0.00]           | 0.50    |
| SNORA18—677805   | 0.2                      | 0.00     | [0.00, 0.00]           | 0.50    |
| SCN10A—6336      | 0.3                      | 0.00     | [0.00, 0.00]           | 0.50    |
| CDCP2—200008     | 0.7                      | 0.00     | [0.00, 0.00]           | 0.50    |
| FGF17—8822       | 3.3                      | 1.01     | [0.00, 1.00]           | 0.03    |
| NTN5—126147      | 5.7                      | 4.35     | [2.00, 7.50]           | 0.41    |
| NCRNA00185—55410 | 11.5                     | 0.00     | [0.00, 0.00]           | 0.50    |
| CCR8—1237        | 16.6                     | 12.18    | [4.00, 17.50]          | 0.22    |
| CCDC33—80125     | 23.1                     | 6.01     | [1.00, 10.00]          | 0.17    |
| PPAPDC3—84814    | 23.5                     | 19.68    | [13.50, 24.00]         | 0.36    |
| PCDHGB2—56103    | 68.1                     | 33.59    | [18.50, 46.00]         | 0.34    |
| FAM81A—145773    | 81.1                     | 45.82    | [31.00, 71.50]         | 0.59    |
| ZNF383—163087    | 81.2                     | 85.50    | [68.00, 104.50]        | 0.45    |
| ANKRD1—27063     | 87.1                     | 20.69    | [9.50, 34.00]          | 0.36    |
| UGT2B4—7363      | 93.4                     | 1.77     | [0.00, 4.00]           | 0.30    |
| IL12RB1—3594     | 98.9                     | 80.38    | [56.50, 110.00]        | 0.45    |
| ZNF628—89887     | 160.0                    | 158.95   | [121.00, 194.50]       | 0.39    |
| FBF1—85302       | 184.2                    | 162.49   | [111.00, 211.00]       | 0.28    |
| ZNF615—284370    | 209.2                    | 184.09   | [126.00, 218.00]       | 0.25    |
| RHBDD1—84236     | 299.9                    | 275.19   | [214.00, 337.50]       | 0.48    |
| NICN1—84276      | 330.1                    | 320.44   | [264.00, 436.00]       | 0.60    |
| COQ6—51004       | 369.7                    | 335.85   | [265.00, 405.00]       | 0.46    |
| CHAF1A—10036     | 387.3                    | 302.09   | [252.50, 452.50]       | 0.75    |
| DTD1—92675       | 534.5                    | 523.20   | [385.00, 626.00]       | 0.30    |
| EARS2—124454     | 663.7                    | 603.62   | [485.00, 732.50]       | 0.41    |
| KIAA1737—85457   | 668.3                    | 676.88   | [529.00, 806.50]       | 0.39    |
| LRRC8D—55144     | 690.2                    | 645.04   | [550.50, 835.00]       | 0.67    |
| SKIL—6498        | 691.0                    | 594.36   | [479.50, 761.00]       | 0.56    |
| WDR36—134430     | 761.6                    | 752.27   | [631.50, 909.00]       | 0.55    |
| ZNF259—8882      | 831.0                    | 658.89   | [551.00, 903.00]       | 0.71    |
| CHSY1—22856      | 1029.7                   | 872.60   | [721.00, 1146.50]      | 0.59    |
| DHX8—1659        | 1192.9                   | 1150.34  | [957.00, 1552.00]      | 0.67    |
| AGTRAP—57085     | 1254.0                   | 1069.75  | [839.00, 1375.50]      | 0.55    |
| VPS26B—112936    | 1337.3                   | 1189.98  | [912.00, 1415.00]      | 0.40    |
| MCM4—4173        | 1543.3                   | 1094.04  | [795.00, 1417.00]      | 0.41    |
| SLC2A3—6515      | 1559.7                   | 1053.06  | [719.50, 1420.50]      | 0.45    |
| VPS39—23339      | 1594.0                   | 1651.32  | [1274.00, 2078.50]     | 0.43    |
| FOXA1—3169       | 1800.3                   | 1168.83  | [887.50, 1642.00]      | 0.62    |

Additional file 1: Table 3: Posterior predictive model diagnostic – 95th quantile.

| Gene ID          | Mean expression (counts) | $T(S_n)$ | 95th int. $T(x^{rep})$ | P-value |
|------------------|--------------------------|----------|------------------------|---------|
| MRGPRX1—259249   | 0.0                      | 0.00     | [0.00, 0.00]           | 0.50    |
| C17orf105—284067 | 0.0                      | 1.01     | [0.00, 0.05]           | 0.00    |
| HBBP1—3044       | 0.1                      | 0.50     | [0.00, 1.00]           | 0.07    |
| SNORA18—677805   | 0.2                      | 0.25     | [0.00, 0.00]           | 0.00    |
| SCN10A—6336      | 0.3                      | 1.49     | [0.05, 7.45]           | 0.38    |
| CDCP2—200008     | 0.7                      | 2.12     | [0.05, 25.10]          | 0.56    |
| FGF17—8822       | 3.3                      | 16.60    | [6.35, 279.40]         | 0.78    |
| NTN5—126147      | 5.7                      | 14.10    | [16.40, 109.85]        | 0.97    |
| NCRNA00185—55410 | 11.5                     | 38.88    | [1.05, 146.00]         | 0.20    |
| CCR8—1237        | 16.6                     | 38.64    | [42.30, 308.40]        | 0.97    |
| CCDC33—80125     | 23.1                     | 107.94   | [59.25, 2444.60]       | 0.85    |
| PPAPDC3—84814    | 23.5                     | 48.09    | [35.05, 87.75]         | 0.66    |
| PCDHGB2—56103    | 68.1                     | 179.96   | [89.40, 276.50]        | 0.36    |
| FAM81A—145773    | 81.1                     | 200.17   | [127.60, 378.45]       | 0.54    |
| ZNF383—163087    | 81.2                     | 144.50   | [144.55, 263.35]       | 0.95    |
| ANKRD1—27063     | 87.1                     | 225.79   | [82.90, 400.90]        | 0.31    |
| UGT2B4—7363      | 93.4                     | 54.66    | [19.50, 1361.35]       | 0.80    |
| IL12RB1—3594     | 98.9                     | 230.41   | [155.80, 432.00]       | 0.65    |
| ZNF628—89887     | 160.0                    | 299.84   | [269.00, 554.20]       | 0.86    |
| FBF1—85302       | 184.2                    | 374.78   | [297.80, 748.75]       | 0.72    |
| ZNF615—284370    | 209.2                    | 368.14   | [316.55, 769.65]       | 0.87    |
| RHBDD1—84236     | 299.9                    | 427.40   | [455.05, 820.10]       | 0.97    |
| NICN1—84276      | 330.1                    | 737.03   | [611.90, 1253.15]      | 0.74    |
| COQ6—51004       | 369.7                    | 568.48   | [542.15, 1066.55]      | 0.90    |
| CHAF1A—10036     | 387.3                    | 834.67   | [617.75, 1323.90]      | 0.54    |
| DTD1—92675       | 534.5                    | 989.05   | [832.60, 1590.50]      | 0.75    |
| EARS2—124454     | 663.7                    | 1005.24  | [970.90, 1902.00]      | 0.91    |
| KIAA1737—85457   | 668.3                    | 887.21   | [1075.65, 1961.85]     | 1.00    |
| LRRC8D—55144     | 690.2                    | 1086.87  | [1088.05, 2025.85]     | 0.95    |
| SKIL—6498        | 691.0                    | 1140.47  | [1019.95, 2039.50]     | 0.80    |
| WDR36—134430     | 761.6                    | 1220.71  | [1231.45, 2132.60]     | 0.95    |
| ZNF259—8882      | 831.0                    | 1169.19  | [1186.25, 2164.80]     | 0.95    |
| CHSY1—22856      | 1029.7                   | 1705.17  | [1557.95, 2971.50]     | 0.86    |
| DHX8—1659        | 1192.9                   | 1953.12  | [2051.05, 4246.15]     | 0.97    |
| AGTRAP—57085     | 1254.0                   | 2240.63  | [1841.20, 4096.95]     | 0.76    |
| VPS26B—112936    | 1337.3                   | 1847.39  | [1949.45, 3436.10]     | 0.97    |
| MCM4—4173        | 1543.3                   | 3410.08  | [2205.70, 5370.80]     | 0.41    |
| SLC2A3—6515      | 1559.7                   | 3378.11  | [2183.05, 5712.85]     | 0.51    |
| VPS39—23339      | 1594.0                   | 2514.10  | [2719.90, 5625.80]     | 0.98    |
| FOXA1—3169       | 1800.3                   | 3302.97  | [2553.55, 6376.40]     | 0.73    |

Additional file 1: Table 4: Posterior predictive model diagnostic – IQR.

| Gene ID          | Mean expression (counts) | $T(S_n)$ | 95th int. $T(x^{rep})$ | P-value |
|------------------|--------------------------|----------|------------------------|---------|
| MRGPRX1—259249   | 0.0                      | 0.00     | [0.00, 0.00]           | 0.50    |
| C17orf105—284067 | 0.0                      | 0.00     | [0.00, 0.00]           | 0.50    |
| HBBP1—3044       | 0.1                      | 0.00     | [0.00, 0.00]           | 0.50    |
| SNORA18—677805   | 0.2                      | 0.00     | [0.00, 0.00]           | 0.50    |
| SCN10A—6336      | 0.3                      | 0.50     | [0.00, 0.00]           | 0.03    |
| CDCP2—200008     | 0.7                      | 0.98     | [0.00, 1.00]           | 0.07    |
| FGF17—8822       | 3.3                      | 2.59     | [1.00, 9.00]           | 0.52    |
| NTN5—126147      | 5.7                      | 6.93     | [4.50, 21.75]          | 0.75    |
| NCRNA00185—55410 | 11.5                     | 5.45     | [0.00, 1.50]           | 0.00    |
| CCR8—1237        | 16.6                     | 17.69    | [11.00, 58.00]         | 0.66    |
| CCDC33—80125     | 23.1                     | 17.19    | [6.25, 93.25]          | 0.60    |
| PPAPDC3—84814    | 23.5                     | 13.91    | [11.00, 25.50]         | 0.79    |
| PCDHGB2—56103    | 68.1                     | 43.70    | [28.50, 82.25]         | 0.60    |
| FAM81A—145773    | 81.1                     | 63.53    | [38.75, 109.75]        | 0.51    |
| ZNF383—163087    | 81.2                     | 34.43    | [40.25, 86.75]         | 1.00    |
| ANKRD1—27063     | 87.1                     | 74.52    | [21.25, 83.75]         | 0.11    |
| UGT2B4—7363      | 93.4                     | 6.98     | [2.00, 43.50]          | 0.64    |
| IL12RB1—3594     | 98.9                     | 84.17    | [47.50, 130.00]        | 0.42    |
| ZNF628—89887     | 160.0                    | 100.43   | [78.50, 171.50]        | 0.73    |
| FBF1—85302       | 184.2                    | 154.54   | [95.00, 226.75]        | 0.36    |
| ZNF615—284370    | 209.2                    | 117.16   | [96.00, 228.50]        | 0.82    |
| RHBDD1—84236     | 299.9                    | 126.20   | [128.75, 275.50]       | 0.96    |
| NICN1—84276      | 330.1                    | 246.20   | [179.75, 411.50]       | 0.61    |
| COQ6—51004       | 369.7                    | 153.72   | [153.50, 361.00]       | 0.95    |
| CHAF1A—10036     | 387.3                    | 234.48   | [172.75, 422.25]       | 0.72    |
| DTD1—92675       | 534.5                    | 297.30   | [236.75, 533.75]       | 0.77    |
| EARS2—124454     | 663.7                    | 237.65   | [262.25, 578.50]       | 0.98    |
| KIAA1737—85457   | 668.3                    | 220.32   | [281.50, 651.75]       | 0.99    |
| LRRC8D—55144     | 690.2                    | 359.07   | [285.00, 655.50]       | 0.83    |
| SKIL—6498        | 691.0                    | 247.07   | [290.75, 615.75]       | 1.00    |
| WDR36—134430     | 761.6                    | 216.40   | [331.25, 737.50]       | 1.00    |
| ZNF259—8882      | 831.0                    | 322.44   | [314.50, 715.00]       | 0.94    |
| CHSY1—22856      | 1029.7                   | 441.38   | [442.25, 1005.00]      | 0.95    |
| DHX8—1659        | 1192.9                   | 582.12   | [584.75, 1240.00]      | 0.95    |
| AGTRAP—57085     | 1254.0                   | 622.58   | [532.25, 1264.50]      | 0.86    |
| VPS26B—112936    | 1337.3                   | 529.40   | [536.00, 1111.25]      | 0.96    |
| MCM4—4173        | 1543.3                   | 835.39   | [631.25, 1588.50]      | 0.74    |
| SLC2A3—6515      | 1559.7                   | 845.02   | [611.00, 1788.75]      | 0.79    |
| VPS39—23339      | 1594.0                   | 586.40   | [764.75, 1831.00]      | 1.00    |
| FOXA1—3169       | 1800.3                   | 1275.06  | [765.00, 2040.75]      | 0.50    |

Additional file 1: Table 5: Posterior predictive model diagnostic – Variance.

| Gene ID          | Mean expression (counts) | $T(S_n)$   | 95th int. $T(x^{rep})$  | P-value |
|------------------|--------------------------|------------|-------------------------|---------|
| MRGPRX1—259249   | 0.0                      | 0.00       | [0.00, 0.00]            | 0.04    |
| C17orf105—284067 | 0.0                      | 0.11       | [0.00, 0.12]            | 0.07    |
| HBBP1—3044       | 0.1                      | 0.08       | [0.00, 0.25]            | 0.13    |
| SNORA18—677805   | 0.2                      | 0.01       | [0.00, 0.05]            | 0.25    |
| SCN10A—6336      | 0.3                      | 0.36       | [0.05, 1242.64]         | 0.69    |
| CDCP2—200008     | 0.7                      | 0.74       | [0.16, 5117.85]         | 0.80    |
| FGF17—8822       | 3.3                      | 26.34      | [32.90, 1109445.84]     | 0.97    |
| NTN5—126147      | 5.7                      | 42.93      | [51.13, 8446.14]        | 0.96    |
| NCRNA00185—55410 | 11.5                     | 303.63     | [1.35, 1340191.71]      | 0.53    |
| CCR8—1237        | 16.6                     | 157.20     | [285.39, 81521.57]      | 0.98    |
| CCDC33—80125     | 23.1                     | 14201.11   | [2292.16, 31223489.92]  | 0.79    |
| PPAPDC3—84814    | 23.5                     | 181.37     | [112.92, 1048.31]       | 0.80    |
| PCDHGB2—56103    | 68.1                     | 4048.26    | [1228.20, 20426.96]     | 0.52    |
| FAM81A—145773    | 81.1                     | 5661.96    | [1970.14, 26450.20]     | 0.53    |
| ZNF383—163087    | 81.2                     | 1206.74    | [1301.43, 6287.70]      | 0.96    |
| ANKRD1—27063     | 87.1                     | 9884.12    | [1356.27, 51853.87]     | 0.36    |
| UGT2B4—7363      | 93.4                     | 5664.11    | [291.72, 8368761.19]    | 0.66    |
| IL12RB1—3594     | 98.9                     | 4745.05    | [2290.87, 27420.28]     | 0.79    |
| ZNF628—89887     | 160.0                    | 6534.92    | [5024.43, 31689.22]     | 0.87    |
| FBF1—85302       | 184.2                    | 12711.43   | [7286.06, 71120.08]     | 0.77    |
| ZNF615—284370    | 209.2                    | 11122.81   | [9659.19, 69434.34]     | 0.88    |
| RHBDD1—84236     | 299.9                    | 8546.28    | [13399.90, 63578.81]    | 0.99    |
| NICN1—84276      | 330.1                    | 32463.87   | [26378.50, 154304.78]   | 0.87    |
| COQ6—51004       | 369.7                    | 15005.15   | [19147.05, 94982.52]    | 0.98    |
| CHAF1A—10036     | 387.3                    | 47233.01   | [28450.33, 196129.54]   | 0.74    |
| DTD1—92675       | 534.5                    | 59301.87   | [45681.73, 251258.48]   | 0.90    |
| EARS2—124454     | 663.7                    | 52839.46   | [58542.64, 301221.33]   | 0.98    |
| KIAA1737—85457   | 668.3                    | 48505.67   | [75259.02, 340071.74]   | 0.99    |
| LRRC8D—55144     | 690.2                    | 48918.16   | [78779.94, 378872.68]   | 1.00    |
| SKIL—6498        | 691.0                    | 56797.55   | [69545.32, 366715.84]   | 0.97    |
| WDR36—134430     | 761.6                    | 49947.90   | [88525.22, 422834.77]   | 1.00    |
| ZNF259—8882      | 831.0                    | 88575.80   | [82583.27, 472063.68]   | 0.94    |
| CHSY1—22856      | 1029.7                   | 201986.35  | [168564.65, 873474.11]  | 0.90    |
| DHX8—1659        | 1192.9                   | 348984.33  | [285590.39, 1578955.67] | 0.87    |
| AGTRAP—57085     | 1254.0                   | 424287.54  | [248618.71, 1869240.10] | 0.71    |
| VPS26B—112936    | 1337.3                   | 158070.60  | [240558.63, 1169889.12] | 1.00    |
| MCM4—4173        | 1543.3                   | 901681.93  | [386142.75, 3614045.91] | 0.63    |
| SLC2A3—6515      | 1559.7                   | 1037093.04 | [421036.96, 4698669.95] | 0.61    |
| VPS39—23339      | 1594.0                   | 328769.35  | [481155.30, 2674633.59] | 1.00    |
| FOXA1—3169       | 1800.3                   | 1688527.66 | [680898.40, 7470155.18] | 0.54    |
